# Supplementary material for: Transcriptome-wide characterization and functional analysis of MATE transporters in response to aluminum toxicity in Medicago sativa L
Source: PeerJ. 2019 Jan 31;7:e6302. doi: 10.7717/peerj.6302 (PMC6360082; doi:10.7717/peerj.6302)
Supplement: Supplemental Information 1 [file peerj-07-6302-s001.xlsx]

## Sheet: Sheet1
Table S1. The qRT-PCR primers for MsMATE genes.
Gene	Forward primer (5′–3′)	Reverse primer (5′–3′)
MsMATE01	GCGACACAAATCCAGCGAAG	GGCACCACAGAGACCATTCA
MsMATE02	ATTCAAATCCTCCTACCCTTGAT	GTGAACCTCCTGCTAGTTCCA
MsMATE03	GCTGTCTATTGCCTTGCCTG	CTGCAGCTAATTCAACCGCC
MsMATE04	ACCCTAATCTCAAACCGCTTC	TCATCGCCGGTGAGTTGTT
MsMATE05	GCCGAAACCACTCCTGAACAAC	TCAAGAGTACCGAGTCGACCA
MsMATE06	AGATCTCTTGGTGCTCCTGC	TTGTCAAGGCATACATACCAGTG
MsMATE07	CACTGTCTTGGCTCCTCTGG	CCCACATAGGTAGAAGGCTCC
MsMATE08	ACATCTCAGAAGCACCACCAT	TACCAAGGTGGCCGGAAAAG
MsMATE09	ATGACATCCTCCCTTCTCGC	CCATCAAAGACAAAGGCGGGAG
MsMATE22	TGTCATCTGCTGGTGGATTC	CCATGGTCCTGATCCAGTTC
Actin	CTAGGATCCAAAATGGCCGATGGTGAGG	GAAACTCACCACCACGAACCAG
