# Supplementary material for: Transcriptome-wide characterization and functional analysis of MATE transporters in response to aluminum toxicity in Medicago sativa L
Source: PeerJ. 2019 Jan 31;7:e6302. doi: 10.7717/peerj.6302 (PMC6360082; doi:10.7717/peerj.6302)
Supplement: Supplemental Information 3 [file peerj-07-6302-s003.xlsx]

## Sheet: Sheet1
Table S3. Eighty-eight MATE proteins were identified through multiple alignments and Pfam search.
Gene name	Gene accession No.	Envelope start	Envelope end	Alignment start	Alignment end	Hmm acc	Hmm name	HMM from	HMM to	HMM length	Bit score	Individual E-value	Conditional E-value	database significant	outcompeted	clan
MsMATE01	contig_100202	191	282	183	283	PF01554.17	MatE	71	160	161	46.37	3e-12	1.8e-16	1	0	CL0222
MsMATE01		343	448	340	459	PF01554.17	MatE	5	110	161	29.1	6.3e-07	3.7e-11	1	0	CL0222
MsMATE02	contig_100277	191	282	184	283	PF01554.17	MatE	71	160	161	46.09	3.7e-12	4.4e-16	1	0	CL0222
MsMATE02		343	491	340	499	PF01554.17	MatE	5	153	161	42.82	3.7e-11	4.5e-15	1	0	CL0222
MsMATE03	contig_100659	89	187	82	188	PF01554.17	MatE	64	160	161	46.41	3e-12	1.8e-16	1	0	CL0222
MsMATE03		248	402	245	404	PF01554.17	MatE	5	159	161	40.53	1.9e-10	1.1e-14	1	0	CL0222
MsMATE04	contig_100733	195	288	187	289	PF01554.17	MatE	69	160	161	45.57	5.4e-12	6.4e-16	1	0	CL0222
MsMATE04		349	503	346	505	PF01554.17	MatE	5	159	161	39.95	2.9e-10	3.4e-14	1	0	CL0222
MsMATE05	contig_10074	183	281	176	282	PF01554.17	MatE	64	160	161	45.96	4.1e-12	7.3e-16	1	0	CL0222
MsMATE05		342	496	339	498	PF01554.17	MatE	5	159	161	39.99	2.8e-10	5e-14	1	0	CL0222
MsMATE06	contig_101973	158	244	150	247	PF01554.17	MatE	71	155	161	41.63	8.8e-11	5.2e-15	1	0	CL0222
MsMATE07	contig_10202	158	250	150	250	PF01554.17	MatE	71	161	161	46.57	2.6e-12	3.2e-16	1	0	CL0222
MsMATE07		309	421	307	427	PF01554.17	MatE	4	116	161	33.44	2.9e-08	3.5e-12	1	0	CL0222
MsMATE08	contig_102039	145	237	137	237	PF01554.17	MatE	71	161	161	46.26	3.3e-12	3.9e-16	1	0	CL0222
MsMATE09	contig_102829	158	250	150	250	PF01554.17	MatE	71	161	161	46.06	3.8e-12	4.5e-16	1	0	CL0222
MsMATE10	contig_104082	124	212	121	216	PF01554.17	MatE	71	157	161	39.38	4.3e-10	5.1e-14	1	0	CL0222
MsMATE10		283	421	274	433	PF01554.17	MatE	12	150	161	44.1	1.5e-11	1.8e-15	1	0	CL0222
MsMATE11	contig_105398	83	174	82	178	PF01554.17	MatE	59	148	161	35.73	5.7e-09	3.4e-13	1	0	CL0222
MsMATE12	contig_105776	83	187	82	187	PF01554.17	MatE	59	161	161	40.17	2.5e-10	2.9e-14	1	0	CL0222
MsMATE12		249	395	243	406	PF01554.17	MatE	7	153	161	51.63	7.3e-14	8.7e-18	1	0	CL0222
MsMATE13	contig_107199	83	186	82	187	PF01554.17	MatE	59	160	161	40.46	2e-10	2.4e-14	1	0	CL0222
MsMATE14	contig_108236	109	269	109	268	PF01554.17	MatE	1	160	161	114.5	3.4e-33	3.8e-14	1	0	CL0222
MsMATE15	contig_109074	124	274	116	278	PF01554.17	MatE	9	157	161	44.96	8.2e-12	9.8e-16	1	0	CL0222
MsMATE16	contig_10995	125	277	119	281	PF01554.17	MatE	7	157	161	46.03	3.9e-12	4.6e-16	1	0	CL0222
MsMATE17	contig_12020	118	270	112	274	PF01554.17	MatE	7	157	161	50.69	1.4e-13	1.7e-17	1	0	CL0222
MsMATE18	contig_1232	105	257	99	288	PF01554.17	MatE	7	157	161	43.5	2.3e-11	1.4e-15	1	0	CL0222
MsMATE19	contig_12358	105	258	99	261	PF01554.17	MatE	7	158	161	47.25	1.6e-12	9.8e-17	1	0	CL0222
MsMATE20	contig_12956	167	320	161	323	PF01554.17	MatE	7	158	161	53.37	2.1e-14	1.3e-18	1	0	CL0222
MsMATE21	contig_13352	123	274	115	277	PF01554.17	MatE	9	158	161	51.47	8.2e-14	4.9e-18	1	0	CL0222
MsMATE22	contig_13394	7	85	3	89	PF01554.17	MatE	79	157	161	29.51	4.7e-07	2.8e-11	1	0	CL0222
MsMATE23	contig_14076	18	126	1	126	PF01554.17	MatE	54	161	161	61.04	9.3e-17	5.6e-21	1	0	CL0222
MsMATE24	contig_15677	54	213	54	214	PF01554.17	MatE	1	160	161	107.11	6.3e-31	3.8e-35	1	0	CL0222
MsMATE24		278	438	276	439	PF01554.17	MatE	3	160	161	103.58	7.6e-30	4.6e-34	1	0	CL0222
MsMATE25	contig_15678	34	194	34	194	PF01554.17	MatE	1	161	161	118.33	2.2e-34	1.3e-38	1	0	CL0222
MsMATE25		261	422	261	423	PF01554.17	MatE	1	159	161	108.65	2.1e-31	1.3e-35	1	0	CL0222
MsMATE26	contig_15679	30	187	30	190	PF01554.17	MatE	1	158	161	96.47	1.2e-27	7.1e-32	1	0	CL0222
MsMATE26		269	429	268	430	PF01554.17	MatE	3	160	161	109.53	1.1e-31	6.8e-36	1	0	CL0222
MsMATE27	contig_17240	38	198	38	198	PF01554.17	MatE	1	161	161	121.21	2.9e-35	1.7e-39	1	0	CL0222
MsMATE27		256	417	256	418	PF01554.17	MatE	1	159	161	120.75	4e-35	2.4e-39	1	0	CL0222
MsMATE28	contig_17241	67	227	67	227	PF01554.17	MatE	1	161	161	127.16	4.3e-37	2.6e-41	1	0	CL0222
MsMATE28		288	450	288	451	PF01554.17	MatE	1	160	161	127.63	3.1e-37	1.8e-41	1	0	CL0222
MsMATE29	contig_18646	65	225	65	225	PF01554.17	MatE	1	161	161	126.79	5.5e-37	3.3e-41	1	0	CL0222
MsMATE29		286	448	286	449	PF01554.17	MatE	1	160	161	124.14	3.6e-36	2.2e-40	1	0	CL0222
MsMATE30	contig_18647	73	233	73	233	PF01554.17	MatE	1	161	161	127.55	3.2e-37	1.9e-41	1	0	CL0222
MsMATE30		294	456	294	457	PF01554.17	MatE	1	160	161	121.38	2.6e-35	1.5e-39	1	0	CL0222
MsMATE31	contig_18691	75	235	75	235	PF01554.17	MatE	1	161	161	126.25	8.2e-37	4.9e-41	1	0	CL0222
MsMATE31		296	459	296	459	PF01554.17	MatE	1	161	161	126.23	8.3e-37	5e-41	1	0	CL0222
MsMATE32	contig_26956	50	209	50	210	PF01554.17	MatE	1	160	161	115.39	1.8e-33	1.1e-37	1	0	CL0222
MsMATE32	contig_27612	271	432	271	434	PF01554.17	MatE	1	159	161	102.01	2.3e-29	1.4e-33	1	0	CL0222
MsMATE33		42	201	42	202	PF01554.17	MatE	1	160	161	105.95	1.4e-30	8.5e-35	1	0	CL0222
MsMATE34	contig_29165	42	201	42	202	PF01554.17	MatE	1	160	161	104.12	5.2e-30	3.1e-34	1	0	CL0222
MsMATE34	contig_29244	263	424	263	426	PF01554.17	MatE	1	159	161	107.06	6.5e-31	3.9e-35	1	0	CL0222
MsMATE35		108	269	108	271	PF01554.17	MatE	1	159	161	103.2	1e-29	6e-34	1	0	CL0222
MsMATE36	contig_30290	35	195	35	195	PF01554.17	MatE	1	161	161	87.97	4.8e-25	2.9e-29	1	0	CL0222
MsMATE36		256	418	256	419	PF01554.17	MatE	1	160	161	92.42	2.1e-26	1.2e-30	1	0	CL0222
MsMATE37	contig_33074	35	195	35	195	PF01554.17	MatE	1	161	161	93.37	1.1e-26	6.4e-31	1	0	CL0222
MsMATE37	contig_33327	256	419	256	419	PF01554.17	MatE	1	161	161	88.37	3.7e-25	2.2e-29	1	0	CL0222
MsMATE38	contig_34077	35	195	35	195	PF01554.17	MatE	1	161	161	89.62	1.5e-25	9e-30	1	0	CL0222
MsMATE39		95	258	95	258	PF01554.17	MatE	1	161	161	89.72	1.4e-25	8.4e-30	1	0	CL0222
MsMATE40	contig_34876	52	211	52	212	PF01554.17	MatE	1	160	161	103.29	9.4e-30	5.6e-34	1	0	CL0222
MsMATE40		273	434	273	436	PF01554.17	MatE	1	159	161	98.12	3.7e-28	2.2e-32	1	0	CL0222
MsMATE41	contig_35030	38	197	38	198	PF01554.17	MatE	1	160	161	97.31	6.5e-28	3.9e-32	1	0	CL0222
MsMATE41		259	421	259	422	PF01554.17	MatE	1	160	161	86.24	1.7e-24	9.9e-29	1	0	CL0222
MsMATE42	contig_39278	39	199	39	200	PF01554.17	MatE	1	160	161	86.91	1e-24	6.2e-29	1	0	CL0222
MsMATE42		261	423	261	424	PF01554.17	MatE	1	160	161	100.46	7e-29	4.2e-33	1	0	CL0222
MsMATE43	contig_39281	25	186	25	186	PF01554.17	MatE	1	161	161	99.32	1.6e-28	9.4e-33	1	0	CL0222
MsMATE43		247	408	247	410	PF01554.17	MatE	1	159	161	96.74	9.7e-28	5.8e-32	1	0	CL0222
MsMATE44	contig_44315	47	208	47	208	PF01554.17	MatE	1	161	161	99.18	1.7e-28	1e-32	1	0	CL0222
MsMATE44		269	430	269	432	PF01554.17	MatE	1	159	161	96.61	1.1e-27	6.4e-32	1	0	CL0222
MsMATE45	contig_44785	52	213	52	213	PF01554.17	MatE	1	161	161	101.93	2.5e-29	1.5e-33	1	0	CL0222
MsMATE45		274	436	274	437	PF01554.17	MatE	1	160	161	90.91	6e-26	3.6e-30	1	0	CL0222
MsMATE46	contig_47783	23	184	23	184	PF01554.17	MatE	1	161	161	102.12	2.2e-29	1.3e-33	1	0	CL0222
MsMATE46		245	407	245	408	PF01554.17	MatE	1	160	161	91.1	5.3e-26	3.2e-30	1	0	CL0222
MsMATE47	contig_49935	23	184	23	184	PF01554.17	MatE	1	161	161	102.1	2.2e-29	1.3e-33	1	0	CL0222
MsMATE47	contig_55150	245	407	245	408	PF01554.17	MatE	1	160	161	100.46	7e-29	4.2e-33	1	0	CL0222
MsMATE48		23	73	23	90	PF01554.17	MatE	1	49	161	34.2	1.7e-08	1e-12	1	0	CL0222
MsMATE49	contig_55303	54	214	54	214	PF01554.17	MatE	1	161	161	131.29	2.3e-38	1.4e-42	1	0	CL0222
MsMATE49		277	437	275	438	PF01554.17	MatE	3	160	161	89.33	1.9e-25	1.1e-29	1	0	CL0222
MsMATE50	contig_5593	22	182	22	182	PF01554.17	MatE	1	161	161	114.27	4e-33	2.4e-37	1	0	CL0222
MsMATE50		243	405	243	406	PF01554.17	MatE	1	160	161	104.09	5.3e-30	3.2e-34	1	0	CL0222
MsMATE51	contig_56894	38	197	38	198	PF01554.17	MatE	1	160	161	126.25	8.2e-37	4.9e-41	1	0	CL0222
MsMATE51		261	423	261	424	PF01554.17	MatE	1	160	161	110.72	4.9e-32	2.9e-36	1	0	CL0222
MsMATE52	contig_57707	38	197	38	198	PF01554.17	MatE	1	160	161	125.34	1.5e-36	9.3e-41	1	0	CL0222
MsMATE52		261	406	261	407	PF01554.17	MatE	1	144	161	100.21	8.4e-29	5e-33	1	0	CL0222
MsMATE53	contig_57708	7	162	6	162	PF01554.17	MatE	6	161	161	125.59	1.3e-36	7.7e-41	1	0	CL0222
MsMATE53		225	387	225	388	PF01554.17	MatE	1	160	161	110.63	5.2e-32	3.1e-36	1	0	CL0222
MsMATE54	contig_58273	38	198	38	198	PF01554.17	MatE	1	161	161	124.39	3e-36	1.8e-40	1	0	CL0222
MsMATE54		261	423	261	424	PF01554.17	MatE	1	160	161	110.4	6.1e-32	3.6e-36	1	0	CL0222
MsMATE55	contig_59273	42	201	42	201	PF01554.17	MatE	1	161	161	116.04	1.1e-33	6.7e-38	1	0	CL0222
MsMATE55		262	421	261	423	PF01554.17	MatE	3	159	161	87.02	9.5e-25	5.7e-29	1	0	CL0222
MsMATE56	contig_59613	42	198	42	202	PF01554.17	MatE	1	157	161	108.37	2.6e-31	1.5e-35	1	0	CL0222
MsMATE56		263	422	262	424	PF01554.17	MatE	3	159	161	87.96	4.9e-25	2.9e-29	1	0	CL0222
MsMATE57	contig_59993	42	197	42	202	PF01554.17	MatE	1	156	161	107.35	5.3e-31	3.2e-35	1	0	CL0222
MsMATE57		263	422	262	424	PF01554.17	MatE	3	159	161	86.18	1.7e-24	1e-28	1	0	CL0222
MsMATE58	contig_61347	42	198	42	201	PF01554.17	MatE	1	158	161	114.35	3.7e-33	2.2e-37	1	0	CL0222
MsMATE58		262	421	261	423	PF01554.17	MatE	3	159	161	86.97	9.8e-25	5.9e-29	1	0	CL0222
MsMATE59	contig_61353	42	196	42	201	PF01554.17	MatE	1	156	161	112.51	1.4e-32	8.2e-37	1	0	CL0222
MsMATE59		262	421	261	423	PF01554.17	MatE	3	159	161	87.31	7.8e-25	4.6e-29	1	0	CL0222
MsMATE60	contig_64662	42	198	42	201	PF01554.17	MatE	1	158	161	114.82	2.7e-33	1.6e-37	1	0	CL0222
MsMATE60		262	421	261	423	PF01554.17	MatE	3	159	161	88.43	3.5e-25	2.1e-29	1	0	CL0222
MsMATE61	contig_66575	42	198	42	201	PF01554.17	MatE	1	158	161	112.77	1.1e-32	6.8e-37	1	0	CL0222
MsMATE61		262	421	261	423	PF01554.17	MatE	3	159	161	87.36	7.5e-25	4.5e-29	1	0	CL0222
MsMATE62	contig_67273	42	196	42	201	PF01554.17	MatE	1	156	161	110.64	5.2e-32	3.1e-36	1	0	CL0222
MsMATE62		262	413	261	418	PF01554.17	MatE	3	152	161	70.75	9.6e-20	5.8e-24	1	0	CL0222
MsMATE63	contig_67274	61	220	61	221	PF01554.17	MatE	1	160	161	104.73	3.4e-30	2e-34	1	0	CL0222
MsMATE63		282	442	281	444	PF01554.17	MatE	2	159	161	120.15	6.1e-35	3.7e-39	1	0	CL0222
MsMATE64	contig_68249	61	220	61	221	PF01554.17	MatE	1	160	161	104.96	2.9e-30	1.7e-34	1	0	CL0222
MsMATE64	contig_6966	282	442	281	444	PF01554.17	MatE	2	159	161	120.38	5.2e-35	3.1e-39	1	0	CL0222
MsMATE65		61	220	61	221	PF01554.17	MatE	1	160	161	106.17	1.2e-30	7.3e-35	1	0	CL0222
MsMATE66	contig_71102	70	230	70	230	PF01554.17	MatE	1	161	161	113.21	8.4e-33	5e-37	1	0	CL0222
MsMATE66	contig_73257	291	452	290	453	PF01554.17	MatE	2	160	161	119.61	9e-35	5.4e-39	1	0	CL0222
MsMATE67		2	121	1	121	PF01554.17	MatE	41	161	161	91.6	3.7e-26	2.2e-30	1	0	CL0222
MsMATE68	contig_73944	2	121	1	121	PF01554.17	MatE	41	161	161	88.6	3.1e-25	1.9e-29	1	0	CL0222
MsMATE68		183	344	182	345	PF01554.17	MatE	2	160	161	110.27	6.7e-32	4e-36	1	0	CL0222
MsMATE69	contig_77421	75	235	75	235	PF01554.17	MatE	1	161	161	119.67	8.6e-35	5.2e-39	1	0	CL0222
MsMATE69		297	458	296	459	PF01554.17	MatE	2	160	161	110.09	7.6e-32	4.6e-36	1	0	CL0222
MsMATE70	contig_77812	75	235	75	235	PF01554.17	MatE	1	161	161	118.79	1.6e-34	9.6e-39	1	0	CL0222
MsMATE70		297	458	296	459	PF01554.17	MatE	2	160	161	109.25	1.4e-31	8.2e-36	1	0	CL0222
MsMATE71	contig_78048	75	235	75	235	PF01554.17	MatE	1	161	161	117.14	5.2e-34	3.1e-38	1	0	CL0222
MsMATE71		297	458	296	459	PF01554.17	MatE	2	160	161	109.03	1.6e-31	9.6e-36	1	0	CL0222
MsMATE72	contig_79227	64	224	64	224	PF01554.17	MatE	1	161	161	119.46	1e-34	6e-39	1	0	CL0222
MsMATE72		286	447	285	448	PF01554.17	MatE	2	160	161	109.31	1.3e-31	7.9e-36	1	0	CL0222
MsMATE73	contig_79859	64	224	64	224	PF01554.17	MatE	1	161	161	120.98	3.4e-35	2e-39	1	0	CL0222
MsMATE73	contig_81761	286	447	285	448	PF01554.17	MatE	2	160	161	110.2	7e-32	4.2e-36	1	0	CL0222
MsMATE74		63	223	63	223	PF01554.17	MatE	1	161	161	120.57	4.5e-35	2.7e-39	1	0	CL0222
MsMATE75	contig_81781	64	224	64	224	PF01554.17	MatE	1	161	161	117.75	3.3e-34	2e-38	1	0	CL0222
MsMATE75		286	447	285	448	PF01554.17	MatE	2	160	161	109.03	1.6e-31	9.7e-36	1	0	CL0222
MsMATE76	contig_83808	64	224	64	224	PF01554.17	MatE	1	161	161	117.82	3.2e-34	1.9e-38	1	0	CL0222
MsMATE76		286	447	285	448	PF01554.17	MatE	2	160	161	110.06	7.8e-32	4.7e-36	1	0	CL0222
MsMATE77	contig_84193	63	223	63	223	PF01554.17	MatE	1	161	161	117.82	3.2e-34	1.9e-38	1	0	CL0222
MsMATE77		285	446	284	447	PF01554.17	MatE	2	160	161	110.63	5.2e-32	3.1e-36	1	0	CL0222
MsMATE78	contig_89783	56	216	56	216	PF01554.17	MatE	1	161	161	106.33	1.1e-30	1.3e-34	1	0	CL0222
MsMATE78		326	481	324	482	PF01554.17	MatE	8	160	161	89.95	1.2e-25	1.4e-29	1	0	CL0222
MsMATE79	contig_9017	56	216	56	216	PF01554.17	MatE	1	161	161	107.36	5.3e-31	6.3e-35	1	0	CL0222
MsMATE79		278	438	276	439	PF01554.17	MatE	3	160	161	96.1	1.5e-27	1.8e-31	1	0	CL0222
MsMATE80	contig_93500	52	212	52	212	PF01554.17	MatE	1	161	161	107.56	4.6e-31	2.7e-35	1	0	CL0222
MsMATE80		274	435	272	435	PF01554.17	MatE	3	161	161	95.96	1.7e-27	1e-31	1	0	CL0222
MsMATE81	contig_94295	52	212	52	212	PF01554.17	MatE	1	161	161	109.09	1.5e-31	9.2e-36	1	0	CL0222
MsMATE81		274	435	272	435	PF01554.17	MatE	3	161	161	95.99	1.7e-27	9.9e-32	1	0	CL0222
MsMATE82	contig_95573	52	212	52	212	PF01554.17	MatE	1	161	161	109.55	1.1e-31	6.7e-36	1	0	CL0222
MsMATE82		274	409	272	415	PF01554.17	MatE	3	136	161	77.17	1e-21	6.1e-26	1	0	CL0222
MsMATE83	contig_96525	52	212	52	212	PF01554.17	MatE	1	161	161	109.06	1.6e-31	9.5e-36	1	0	CL0222
MsMATE83		274	435	272	435	PF01554.17	MatE	3	161	161	95.96	1.7e-27	1e-31	1	0	CL0222
MsMATE84	contig_96930	41	201	41	201	PF01554.17	MatE	1	161	161	96.83	9.1e-28	5.5e-32	1	0	CL0222
MsMATE84		263	422	261	423	PF01554.17	MatE	4	160	161	90.84	6.4e-26	3.8e-30	1	0	CL0222
MsMATE85	contig_97072	38	198	38	198	PF01554.17	MatE	1	161	161	97.76	4.7e-28	2.8e-32	1	0	CL0222
MsMATE85		260	420	259	421	PF01554.17	MatE	3	160	161	100.32	7.7e-29	4.6e-33	1	0	CL0222
MsMATE86	contig_9750	40	200	40	200	PF01554.17	MatE	1	161	161	104.09	5.3e-30	3.2e-34	1	0	CL0222
MsMATE86		263	422	261	423	PF01554.17	MatE	4	160	161	99.23	1.7e-28	1e-32	1	0	CL0222
MsMATE87	contig_97618	43	203	43	203	PF01554.17	MatE	1	161	161	104.07	5.4e-30	3.2e-34	1	0	CL0222
MsMATE87		266	425	264	426	PF01554.17	MatE	4	160	161	99.21	1.7e-28	1e-32	1	0	CL0222
MsMATE88	contig_99934	25	185	25	185	PF01554.17	MatE	1	161	161	104.18	5e-30	3e-34	1	0	CL0222
MsMATE88		248	407	246	408	PF01554.17	MatE	4	160	161	99.32	1.6e-28	9.4e-33	1	0	CL0222
