# Supplementary material for: Transcriptome-wide characterization and functional analysis of MATE transporters in response to aluminum toxicity in Medicago sativa L
Source: PeerJ. 2019 Jan 31;7:e6302. doi: 10.7717/peerj.6302 (PMC6360082; doi:10.7717/peerj.6302)
Supplement: Supplemental Information 5 [file peerj-07-6302-s005.xlsx]

## Sheet: Sheet1
Table S5. The 38 well-studied MATE proteins in plants.
Name	Accession no. or AGI code	Plant species	Function	Class	References
AtFFT	At4g25640	Arabidopsis thaliana	Flavonoid transporter	I	Thompson et al. (2010)
AtTT12	At3g59030	Arabidopsis thaliana	Anthocyanin transporter/ vacuolar flavonoid/H+ -antiporter	I	Debeaujon et al. (2001), Marinova et al. (2007), Zhao and Dixon (2009)
BrTT12	ACJ36213	Brassica rapa	Seed coat pigmentation	I	Chai et al. (2009)
MtMATE1	FJ858726	Medicago truncatula	Proanthocyanidin precursor transporter for proanthocyanidin biosynthesis in the seed coat	I	Zhao and Dixon (2009)
MtMATE2	HM856605	Medicago truncatula	Flavonoid transporter/vacuolar sequestration of flavonoid glycosides	I	Zhao et al. (2011)
NtMATE1	AB286961	Nicotiana tabacum	Nicotine transporter/vacuolar sequestration of nicotine	I	Shoji et al. (2009)
NtMATE2	AB286963	Nicotiana tabacum	Nicotine transporter/vacuolar sequestration of nicotine	I	Shoji et al. (2009)
PtMATE	XP_002302594	Populus trichocarpa	Similar with TT12	I	Direct submitted in NCBI
RcEEF49069	EEF49069	Ricinus communis	Putative MATE, similar with TT12	I	Direct submitted in NCBI
RcMATE1	XP_002532702	Ricinus communis	Putative MATE, similar with TT12	I	Direct submitted in NCBI
VvAM1	FJ264202	Vitis vinifera	transporting acylated anthocyanins	I	Gomez et al. (2009), Gomez et al. (2011)
VvAM3	FJ264203	Vitis vinifera	transporting acylated anthocyanins	I	Gomez et al. (2009), Gomez et al. (2011)
VvMATE2	GSVIVT00018841001	Vitis vinifera	Putative proanthocyanidin transporter	I	Pérez-Díaz et al. (2014)
AtALF5	At3g23560	Arabidopsis thaliana	xenobiotics efflux	II	Diener et al. (2001)
AtDTX1	At2g04070	Arabidopsis thaliana	xenobiotics efflux	II	Li et al. (2002)
Nt-JAT1	AM991692	Nicotiana tabacum	Nicotine efflux transporter	II	Morita et al. (2009)
AtADS1	At4g29140	Arabidopsis thaliana	negatively regulates plant disease resistance/accumulation of the salicylic acid	III	Sun et al. (2011), Li et al. (2014), Wang et al. (2015)
AtZF14	At1g58340	Arabidopsis thaliana	Organ initiation/Fe homeostasis/hypocotyl cell elongation	III	Burko et al. (2011), Seo et al. (2012), Wang et al. (2015)
ELS1	AT5G19700	Arabidopsis thaliana	Leaf senescence and Iron homeostasis	III	Wang et al. (2016)
AtFRD3	At3g08040	Arabidopsis thaliana	Al and iron translocation	IV	Rogers and Guerinot (2002), Green and Rogers (2004), Durrett et al. (2007), Roschzttardtz et al. (2011)
AtMATE	At1g51340	Arabidopsis thaliana	Al detoxification	IV	Liu et al. (2009), Liu et al. (2012)
BoMATE	KF031944	Brassica oleracea	Al detoxification	IV	Wu et al. (2014)
EcMATE1	AB725912	Eucalyptus camaldulensis	Al detoxification	IV	Sawaki et al. (2013)
GmFRD3b	EU591741	Glycine max	iron translocation	IV	Rogers et al. (2009)
HvAACT1	BAF75822	Hordeum vulgare	Al detoxification; iron translocation	IV	Furukawa et al. (2007), Fujii et al. (2012);Zhou et al. (2013)
MtAC122162	AC122162_1.4	Medicago truncatula	Grouped together with HvAACT1 and AtFRD3 in one phylogenetic clade	IV	Zhao et al. (2011)
OsFRDL1	Os03g0216700	Oryza sativa	iron translocation	IV	Inoue et al. (2004), Yokosho et al. (2009)
OsFRDL4	Os01g0919100	Oryza sativa	Al detoxification	IV	Yokosho et al. (2011)
SbMATE	ABS89149	Sorghum bicolor	Al detoxification	IV	Magalhaes et al. (2007), Sivaguru et al. (2013),Caniato et al. (2014)
ScFRDL1	AB571881	Secale cereale	iron translocation	IV	Yokosho et al. (2010)
ScFRDL2	AB571882	Secale cereale	Al detoxification	IV	Yokosho et al. (2010)
TaMATE	AGD81027	Triticum aestivum	Al detoxification	IV	Ryan et al. (2009)
TaMATE1B	KC152457	Triticum aestivum	Al detoxification; iron translocation	IV	Tovkach et al. (2013)
ZmMATE1	FJ015156.1	Zea mays	Al detoxification	IV	Maron et al. (2010), Maron et al. (2013)
GmMATE75	Glyma.01G007100.1	Glycine max	Al detoxification	IV	Liu et al. (2016）
Sb-MATE1	ABS89149	Sorghum bicolor	Al detoxification	IV	Magalhaes et al. (2007）
OsFRDL2	Os10g0206800	Oryza sativa	Al detoxification	IV	Yokosho et al. (2016)
VuMATE1	KM090855.1	Vigna umbellata	Al detoxification	IV	Liu et al. (2013）
