# Supplementary material for: Transcriptome-wide characterization and functional analysis of MATE transporters in response to aluminum toxicity in Medicago sativa L
Source: PeerJ. 2019 Jan 31;7:e6302. doi: 10.7717/peerj.6302 (PMC6360082; doi:10.7717/peerj.6302)
Supplement: Supplemental Information 6 [file peerj-07-6302-s006.xlsx]

## Sheet: Sheet1
Table S6. Functional annotation of MsMATE genes.
Gene name	Gene accession No.	Top Angiosperm Hit	KEGG ID	KEGG annotation	Arabidopsis Top Hit	Arabidopsis annotation	At_BP_ GO ID	BP_GO description	MF_GO description	Uniprot ID	Uniprot_descrition
MsMATE01	contig_100202	Medtr5g011540.1	K03327	multidrug resistance protein, MATE family	AT4G22790.1	MATE efflux family protein	GO:0006855 GO:0055085	drug_transmembrane_transport transmembrane_transport	antiporter_activity drug_transmembrane_transporter_activity transporter_activity	Q8RWF5	MATE9_ARATH MATE efflux family protein 9 OS=Arabidopsis thaliana GN=DTXL5 PE=2 SV=1
MsMATE02	contig_100277	Medtr5g067460.1	K03327	multidrug resistance protein, MATE family	AT1G58340.1	ZF14 | MATE efflux family protein	GO:0003156 GO:0006810 GO:0006855 GO:0009624 GO:0055072 GO:0055085	drug_transmembrane_transport iron_ion_homeostasis regulation_of_organ_formation response_to_nematode transmembrane_transport transport	antiporter_activity drug_transmembrane_transporter_activity transmembrane_transporter_activity transporter_activity	Q9SIA4	MATE5_ARATH MATE efflux family protein 5 OS=Arabidopsis thaliana GN=DTXL1 PE=3 SV=1
MsMATE03	contig_100659	Medtr7g070210.1	K03327	multidrug resistance protein, MATE family	AT2G38330.1	MATE efflux family protein	GO:0006855 GO:0055085	drug_transmembrane_transport transmembrane_transport	antiporter_activity drug_transmembrane_transporter_activity transporter_activity	Q84K71	MATE2_ARATH MATE efflux family protein 2, chloroplastic OS=Arabidopsis thaliana GN=DTX44 PE=2 SV=1
MsMATE04	contig_100733	Medtr4g071445.2	K03327	multidrug resistance protein, MATE family	AT2G21340.1	MATE efflux family protein	GO:0006855 GO:0055085	drug_transmembrane_transport transmembrane_transport	antiporter_activity drug_transmembrane_transporter_activity	Q8W4G3	MATE4_ARATH MATE efflux family protein 4, chloroplastic OS=Arabidopsis thaliana GN=DTX46 PE=2 SV=1
MsMATE05	contig_10074	Medtr5g099020.1	K03327	multidrug resistance protein, MATE family	AT4G38380.1	MATE efflux family protein	GO:0006855 GO:0055085	drug_transmembrane_transport transmembrane_transport	antiporter_activity drug_transmembrane_transporter_activity	Q9SVE7	MATE3_ARATH MATE efflux family protein 3, chloroplastic OS=Arabidopsis thaliana GN=DTX45 PE=2 SV=2
MsMATE06	contig_101973	Medtr2g097900.1	K03327	multidrug resistance protein, MATE family	AT1G51340.2	MATE efflux family protein	GO:0006855 GO:0019761 GO:0055085	drug_transmembrane_transport glucosinolate_biosynthetic_process transmembrane_transport	antiporter_activity drug_transmembrane_transporter_activity	Q9SYD6	MATE1_ARATH MATE efflux family protein 1 OS=Arabidopsis thaliana GN=MATE PE=2 SV=2
MsMATE07	contig_10202	Medtr1g108840.1	K03327	multidrug resistance protein, MATE family	AT1G15170.1	MATE efflux family protein	GO:0006855 GO:0055085	drug_transmembrane_transport transmembrane_transport	antiporter_activity drug_transmembrane_transporter_activity transporter_activity	Q9SIA4	MATE5_ARATH MATE efflux family protein 5 OS=Arabidopsis thaliana GN=DTXL1 PE=3 SV=1
MsMATE08	contig_102039	Medtr4g048000.1	K03327	multidrug resistance protein, MATE family	AT3G21690.1	MATE efflux family protein	GO:0006855 GO:0009610 GO:0015824 GO:0055085	drug_transmembrane_transport proline_transport response_to_symbiotic_fungus transmembrane_transport	antiporter_activity drug_transmembrane_transporter_activity transporter_activity	Q9LYT3	TT12_ARATH Protein TRANSPARENT TESTA 12 OS=Arabidopsis thaliana GN=TT12 PE=2 SV=1
MsMATE09	contig_102829	Medtr3g029510.2	K03327	multidrug resistance protein, MATE family	AT3G08040.2	FRD3, MAN1, ATFRD3 | MATE efflux family protein |	GO:0006826 GO:0006855 GO:0006879 GO:0010106 GO:0010167 GO:0010413 GO:0015706 GO:0045492 GO:0055085 GO:0071281 GO:0071369 GO:0071732	cellular_iron_ion_homeostasis cellular_response_to_ethylene_stimulus cellular_response_to_iron_ion cellular_response_to_iron_ion_starvation cellular_response_to_nitric_oxide drug_transmembrane_transport glucuronoxylan_metabolic_process iron_ion_transport nitrate_transport response_to_nitrate transmembrane_transport xylan_biosynthetic_process	antiporter_activity citrate_transmembrane_transporter_activity drug_transmembrane_transporter_activity transporter_activity	Q9SFB0	FRD3_ARATH MATE efflux family protein FRD3 OS=Arabidopsis thaliana GN=FRD3 PE=1 SV=1
MsMATE10	contig_104082	Medtr4g071370.1	K03327	multidrug resistance protein, MATE family	AT2G21340.1	MATE efflux family protein	GO:0006855 GO:0055085	drug_transmembrane_transport transmembrane_transport	antiporter_activity drug_transmembrane_transporter_activity	Q8W4G3	MATE4_ARATH MATE efflux family protein 4, chloroplastic OS=Arabidopsis thaliana GN=DTX46 PE=2 SV=1
MsMATE11	contig_105398	Medtr5g032720.1	K03327	multidrug resistance protein, MATE family	AT5G65380.1	MATE efflux family protein	GO:0006855 GO:0009835 GO:0055085	drug_transmembrane_transport fruit_ripening transmembrane_transport	antiporter_activity drug_transmembrane_transporter_activity transporter_activity	Q9LYT3	TT12_ARATH Protein TRANSPARENT TESTA 12 OS=Arabidopsis thaliana GN=TT12 PE=2 SV=1
MsMATE12	contig_105776	Medtr6g047610.1	K03327	multidrug resistance protein, MATE family	AT4G00350.1	MATE efflux family protein	GO:0006855 GO:0009860 GO:0030048 GO:0055085	actin_filament-based_movement drug_transmembrane_transport pollen_tube_growth transmembrane_transport	antiporter_activity drug_transmembrane_transporter_activity transporter_activity	Q9LYT3	TT12_ARATH Protein TRANSPARENT TESTA 12 OS=Arabidopsis thaliana GN=TT12 PE=2 SV=1
MsMATE13	contig_107199	Medtr4g071445.2	K03327	multidrug resistance protein, MATE family	AT2G21340.1	MATE efflux family protein	GO:0006855 GO:0055085	drug_transmembrane_transport transmembrane_transport	antiporter_activity drug_transmembrane_transporter_activity	Q8W4G3	MATE4_ARATH MATE efflux family protein 4, chloroplastic OS=Arabidopsis thaliana GN=DTX46 PE=2 SV=1
MsMATE14	contig_108236	Medtr2g078960.1	K03327	multidrug resistance protein, MATE family	AT3G23560.1	ALF5 | MATE efflux family protein |	GO:0006855 GO:0009636 GO:0055085	drug_transmembrane_transport response_to_toxic_substance transmembrane_transport	antiporter_activity drug_transmembrane_transporter_activity transporter_activity	Q9LUH2	ALF5_ARATH MATE efflux family protein ALF5 OS=Arabidopsis thaliana GN=ALF5 PE=2 SV=1
MsMATE15	contig_109074	Medtr6g066380.1	K03327	multidrug resistance protein, MATE family	AT5G52450.1	MATE efflux family protein	GO:0006855 GO:0009624 GO:0055085	drug_transmembrane_transport response_to_nematode transmembrane_transport	antiporter_activity drug_transmembrane_transporter_activity transporter_activity	Q8RWF5	MATE9_ARATH MATE efflux family protein 9 OS=Arabidopsis thaliana GN=DTXL5 PE=2 SV=1
MsMATE16	contig_10995	Medtr1g109060.1	K03327	multidrug resistance protein, MATE family	AT1G71140.1	MATE efflux family protein	GO:0006855 GO:0055085	drug_transmembrane_transport transmembrane_transport	antiporter_activity drug_transmembrane_transporter_activity transporter_activity	Q8RWF5	MATE9_ARATH MATE efflux family protein 9 OS=Arabidopsis thaliana GN=DTXL5 PE=2 SV=1
MsMATE17	contig_12020	Medtr2g097900.1	K03327	multidrug resistance protein, MATE family	AT1G51340.2	MATE efflux family protein	GO:0006855 GO:0019761 GO:0055085	drug_transmembrane_transport glucosinolate_biosynthetic_process transmembrane_transport	antiporter_activity drug_transmembrane_transporter_activity	Q9SYD6	MATE1_ARATH MATE efflux family protein 1 OS=Arabidopsis thaliana GN=MATE PE=2 SV=2
MsMATE18	contig_1232	Medtr7g087410.1	K03327	multidrug resistance protein, MATE family	AT1G33110.1	MATE efflux family protein	GO:0006855 GO:0009610 GO:0019344 GO:0055085	cysteine_biosynthetic_process drug_transmembrane_transport response_to_symbiotic_fungus transmembrane_transport	antiporter_activity drug_transmembrane_transporter_activity transporter_activity	Q9LYT3	TT12_ARATH Protein TRANSPARENT TESTA 12 OS=Arabidopsis thaliana GN=TT12 PE=2 SV=1
MsMATE19	contig_12358	Medtr7g082800.1	K03327	multidrug resistance protein, MATE family	AT1G66760.2	MATE efflux family protein	GO:0006855 GO:0009611 GO:0009620 GO:0009695 GO:0009753 GO:0055085	drug_transmembrane_transport jasmonic_acid_biosynthetic_process response_to_fungus response_to_jasmonic_acid_stimulus response_to_wounding transmembrane_transport	antiporter_activity drug_transmembrane_transporter_activity transporter_activity	Q9SIA1	MATE8_ARATH MATE efflux family protein 8 OS=Arabidopsis thaliana GN=DTXL4 PE=3 SV=2
MsMATE20	contig_12956	Medtr3g029510.2	K03327	multidrug resistance protein, MATE family	AT3G08040.2	FRD3, MAN1, ATFRD3 | MATE efflux family protein |	GO:0006826 GO:0006855 GO:0006879 GO:0010106 GO:0010167 GO:0010413 GO:0015706 GO:0045492 GO:0055085 GO:0071281 GO:0071369 GO:0071732	cellular_iron_ion_homeostasis cellular_response_to_ethylene_stimulus cellular_response_to_iron_ion cellular_response_to_iron_ion_starvation cellular_response_to_nitric_oxide drug_transmembrane_transport glucuronoxylan_metabolic_process iron_ion_transport nitrate_transport response_to_nitrate transmembrane_transport xylan_biosynthetic_process	antiporter_activity citrate_transmembrane_transporter_activity drug_transmembrane_transporter_activity transporter_activity	Q9SFB0	FRD3_ARATH MATE efflux family protein FRD3 OS=Arabidopsis thaliana GN=FRD3 PE=1 SV=1
MsMATE21	contig_13352	Medtr2g088400.1	K03327	multidrug resistance protein, MATE family	AT3G21690.1	MATE efflux family protein	GO:0006855 GO:0009610 GO:0015824 GO:0055085	drug_transmembrane_transport proline_transport response_to_symbiotic_fungus transmembrane_transport	antiporter_activity drug_transmembrane_transporter_activity transporter_activity	Q9LYT3	TT12_ARATH Protein TRANSPARENT TESTA 12 OS=Arabidopsis thaliana GN=TT12 PE=2 SV=1
MsMATE22	contig_13394	Medtr6g066380.1	K03327	multidrug resistance protein, MATE family	AT5G52450.1	MATE efflux family protein	GO:0006855 GO:0009624 GO:0055085	drug_transmembrane_transport response_to_nematode transmembrane_transport	antiporter_activity drug_transmembrane_transporter_activity transporter_activity	Q9SIA4	MATE5_ARATH MATE efflux family protein 5 OS=Arabidopsis thaliana GN=DTXL1 PE=3 SV=1
MsMATE23	contig_14076	Medtr5g032720.1	K03327	multidrug resistance protein, MATE family	AT5G65380.1	MATE efflux family protein	GO:0006855 GO:0009835 GO:0055085	drug_transmembrane_transport fruit_ripening transmembrane_transport	antiporter_activity drug_transmembrane_transporter_activity transporter_activity	Q9LYT3	TT12_ARATH Protein TRANSPARENT TESTA 12 OS=Arabidopsis thaliana GN=TT12 PE=2 SV=1
MsMATE24	contig_15677	Medtr4g071370.1	K03327	multidrug resistance protein, MATE family	AT2G21340.1	MATE efflux family protein	GO:0006855 GO:0055085	drug_transmembrane_transport transmembrane_transport	antiporter_activity drug_transmembrane_transporter_activity	Q8W4G3	MATE4_ARATH MATE efflux family protein 4, chloroplastic OS=Arabidopsis thaliana GN=DTX46 PE=2 SV=1
MsMATE25	contig_15678	Medtr4g071370.1	K03327	multidrug resistance protein, MATE family	AT2G21340.1	MATE efflux family protein	GO:0006855 GO:0055085	drug_transmembrane_transport transmembrane_transport	antiporter_activity drug_transmembrane_transporter_activity	Q8W4G3	MATE4_ARATH MATE efflux family protein 4, chloroplastic OS=Arabidopsis thaliana GN=DTX46 PE=2 SV=1
MsMATE26	contig_15679	Eucgr.I01314.1	K03327	multidrug resistance protein, MATE family						Q8W4G3	MATE4_ARATH MATE efflux family protein 4, chloroplastic OS=Arabidopsis thaliana GN=DTX46 PE=2 SV=1
MsMATE27	contig_17240	Medtr8g037175.1	K03327	multidrug resistance protein, MATE family	AT3G08040.2	FRD3, MAN1, ATFRD3 | MATE efflux family protein |	GO:0006826 GO:0006855 GO:0006879 GO:0010106 GO:0010167 GO:0010413 GO:0015706 GO:0045492 GO:0055085 GO:0071281 GO:0071369 GO:0071732	cellular_iron_ion_homeostasis cellular_response_to_ethylene_stimulus cellular_response_to_iron_ion cellular_response_to_iron_ion_starvation cellular_response_to_nitric_oxide drug_transmembrane_transport glucuronoxylan_metabolic_process iron_ion_transport nitrate_transport response_to_nitrate transmembrane_transport xylan_biosynthetic_process	antiporter_activity citrate_transmembrane_transporter_activity drug_transmembrane_transporter_activity transporter_activity	Q9SFB0	FRD3_ARATH MATE efflux family protein FRD3 OS=Arabidopsis thaliana GN=FRD3 PE=1 SV=1
MsMATE28	contig_17241	Medtr8g036660.1	K03327	multidrug resistance protein, MATE family						Q9SFB0	FRD3_ARATH MATE efflux family protein FRD3 OS=Arabidopsis thaliana GN=FRD3 PE=1 SV=1
MsMATE29	contig_18646	PGSC0003DMT400086065	K03327	multidrug resistance protein, MATE family						Q9LYT3	TT12_ARATH Protein TRANSPARENT TESTA 12 OS=Arabidopsis thaliana GN=TT12 PE=2 SV=1
MsMATE30	contig_18647	Medtr8g069470.1	K03327	multidrug resistance protein, MATE family	AT1G12950.1	RSH2 | root hair specific 2 |	GO:0006855 GO:0048765 GO:0055085	drug_transmembrane_transport root_hair_cell_differentiation transmembrane_transport	antiporter_activity drug_transmembrane_transporter_activity transporter_activity	Q9LYT3	TT12_ARATH Protein TRANSPARENT TESTA 12 OS=Arabidopsis thaliana GN=TT12 PE=2 SV=1
MsMATE31	contig_18691	Medtr5g033100.1	K03327	multidrug resistance protein, MATE family	AT3G26590.1	MATE efflux family protein	GO:0006855 GO:0055085	drug_transmembrane_transport transmembrane_transport	antiporter_activity drug_transmembrane_transporter_activity transporter_activity	Q9LYT3	TT12_ARATH Protein TRANSPARENT TESTA 12 OS=Arabidopsis thaliana GN=TT12 PE=2 SV=1
MsMATE32	contig_26956	Medtr2g088400.1	K03327	multidrug resistance protein, MATE family	AT3G21690.1	MATE efflux family protein	GO:0006855 GO:0009610 GO:0015824 GO:0055085	drug_transmembrane_transport proline_transport response_to_symbiotic_fungus transmembrane_transport	antiporter_activity drug_transmembrane_transporter_activity transporter_activity	Q9LYT3	TT12_ARATH Protein TRANSPARENT TESTA 12 OS=Arabidopsis thaliana GN=TT12 PE=2 SV=1
MsMATE33	contig_27612	Medtr3g099700.1	K03327	multidrug resistance protein, MATE family	AT5G44050.1	MATE efflux family protein	GO:0006855 GO:0055085	drug_transmembrane_transport transmembrane_transport	antiporter_activity drug_transmembrane_transporter_activity transporter_activity	Q9LYT3	TT12_ARATH Protein TRANSPARENT TESTA 12 OS=Arabidopsis thaliana GN=TT12 PE=2 SV=1
MsMATE34	contig_29165	Medtr2g078960.1	K03327	multidrug resistance protein, MATE family	AT3G23550.1	MATE efflux family protein	GO:0006855 GO:0009723 GO:0055085	drug_transmembrane_transport response_to_ethylene_stimulus transmembrane_transport	antiporter_activity drug_transmembrane_transporter_activity transporter_activity	Q9LUH3	LAL5_ARATH MATE efflux family protein LAL5 OS=Arabidopsis thaliana GN=LAL5 PE=2 SV=1
MsMATE35	contig_29244	Medtr6g047610.1	K03327	multidrug resistance protein, MATE family	AT4G00350.1	MATE efflux family protein	GO:0006855 GO:0009860 GO:0030048 GO:0055085	actin_filament-based_movement drug_transmembrane_transport pollen_tube_growth transmembrane_transport	antiporter_activity drug_transmembrane_transporter_activity transporter_activity	Q9LYT3	TT12_ARATH Protein TRANSPARENT TESTA 12 OS=Arabidopsis thaliana GN=TT12 PE=2 SV=1
MsMATE36	contig_30290	Medtr7g087430.1	K03327	multidrug resistance protein, MATE family	AT1G33110.1	MATE efflux family protein	GO:0006855 GO:0009610 GO:0019344 GO:0055085	cysteine_biosynthetic_process drug_transmembrane_transport response_to_symbiotic_fungus transmembrane_transport	antiporter_activity drug_transmembrane_transporter_activity transporter_activity	Q9LYT3	TT12_ARATH Protein TRANSPARENT TESTA 12 OS=Arabidopsis thaliana GN=TT12 PE=2 SV=1
MsMATE37	contig_33074	Medtr6g047610.1	K03327	multidrug resistance protein, MATE family	AT4G00350.1	MATE efflux family protein	GO:0006855 GO:0009860 GO:0030048 GO:0055085	actin_filament-based_movement drug_transmembrane_transport pollen_tube_growth transmembrane_transport	antiporter_activity drug_transmembrane_transporter_activity transporter_activity	Q9LYT3	TT12_ARATH Protein TRANSPARENT TESTA 12 OS=Arabidopsis thaliana GN=TT12 PE=2 SV=1
MsMATE38	contig_33327	Medtr2g088400.1	K03327	multidrug resistance protein, MATE family	AT3G21690.1	MATE efflux family protein	GO:0006855 GO:0009610 GO:0015824 GO:0055085	drug_transmembrane_transport proline_transport response_to_symbiotic_fungus transmembrane_transport	antiporter_activity drug_transmembrane_transporter_activity transporter_activity	Q9LYT3	TT12_ARATH Protein TRANSPARENT TESTA 12 OS=Arabidopsis thaliana GN=TT12 PE=2 SV=1
MsMATE39	contig_34077	Medtr5g032720.1	K03327	multidrug resistance protein, MATE family	AT5G65380.1	MATE efflux family protein	GO:0006855 GO:0009835 GO:0055085	drug_transmembrane_transport fruit_ripening transmembrane_transport	antiporter_activity drug_transmembrane_transporter_activity transporter_activity	Q9LYT3	TT12_ARATH Protein TRANSPARENT TESTA 12 OS=Arabidopsis thaliana GN=TT12 PE=2 SV=1
MsMATE40	contig_34876	Medtr1g108990.1	K03327	multidrug resistance protein, MATE family	AT1G71140.1	MATE efflux family protein	GO:0006855 GO:0055085	drug_transmembrane_transport transmembrane_transport	antiporter_activity drug_transmembrane_transporter_activity transporter_activity	Q8RWF5	MATE9_ARATH MATE efflux family protein 9 OS=Arabidopsis thaliana GN=DTXL5 PE=2 SV=1
MsMATE41	contig_35030	Medtr7g070210.1	K03327	multidrug resistance protein, MATE family	AT2G38330.1	MATE efflux family protein	GO:0006855 GO:0055085	drug_transmembrane_transport transmembrane_transport	antiporter_activity drug_transmembrane_transporter_activity transporter_activity	Q84K71	MATE2_ARATH MATE efflux family protein 2, chloroplastic OS=Arabidopsis thaliana GN=DTX44 PE=2 SV=1
MsMATE42	contig_39278	Medtr6g081390.1	K03327	multidrug resistance protein, MATE family	AT5G52450.1	MATE efflux family protein	GO:0006855 GO:0009624 GO:0055085	drug_transmembrane_transport response_to_nematode transmembrane_transport	antiporter_activity drug_transmembrane_transporter_activity transporter_activity	Q9SIA5	DTX1_ARATH MATE efflux family protein DTX1 OS=Arabidopsis thaliana GN=DTX1 PE=2 SV=1
MsMATE43	contig_39281	Medtr6g081390.1	K03327	multidrug resistance protein, MATE family	AT5G52450.1	MATE efflux family protein	GO:0006855 GO:0009624 GO:0055085	drug_transmembrane_transport response_to_nematode transmembrane_transport	antiporter_activity drug_transmembrane_transporter_activity transporter_activity	Q9SIA5	DTX1_ARATH MATE efflux family protein DTX1 OS=Arabidopsis thaliana GN=DTX1 PE=2 SV=1
MsMATE44	contig_44315	Medtr6g047640.1	K03327	multidrug resistance protein, MATE family	AT4G00350.1	MATE efflux family protein	GO:0006855 GO:0009860 GO:0030048 GO:0055085	actin_filament-based_movement drug_transmembrane_transport pollen_tube_growth transmembrane_transport	antiporter_activity drug_transmembrane_transporter_activity transporter_activity	Q9LYT3	TT12_ARATH Protein TRANSPARENT TESTA 12 OS=Arabidopsis thaliana GN=TT12 PE=2 SV=1
MsMATE45	contig_44785	Medtr2g078960.1	K03327	multidrug resistance protein, MATE family	AT3G23560.1	ALF5 | MATE efflux family protein |	GO:0006855 GO:0009636 GO:0055085	drug_transmembrane_transport response_to_toxic_substance transmembrane_transport	antiporter_activity drug_transmembrane_transporter_activity transporter_activity	Q9LUH2	ALF5_ARATH MATE efflux family protein ALF5 OS=Arabidopsis thaliana GN=ALF5 PE=2 SV=1
MsMATE46	contig_47783	Medtr6g088805.1	K03327	multidrug resistance protein, MATE family	AT4G29140.1	MATE efflux family protein	GO:0006855 GO:0031348 GO:0046685 GO:0055085	drug_transmembrane_transport negative_regulation_of_defense_response response_to_arsenic-containing_substance transmembrane_transport	antiporter_activity drug_transmembrane_transporter_activity transporter_activity	A7KAU3	S47A2_RABIT Multidrug and toxin extrusion protein 2 OS=Oryctolagus cuniculus GN=SLC47A2 PE=1 SV=1
MsMATE47	contig_54035	Medtr3g099700.1	K03327	multidrug resistance protein, MATE family	AT5G65380.1	MATE efflux family protein	GO:0006855 GO:0009835 GO:0055085	drug_transmembrane_transport fruit_ripening transmembrane_transport	antiporter_activity drug_transmembrane_transporter_activity transporter_activity	Q9LYT3	TT12_ARATH Protein TRANSPARENT TESTA 12 OS=Arabidopsis thaliana GN=TT12 PE=2 SV=1
MsMATE48	contig_55150	Medtr6g047610.1	K03327	multidrug resistance protein, MATE family	AT4G00350.1	MATE efflux family protein	GO:0006855 GO:0009860 GO:0030048 GO:0055085	actin_filament-based_movement drug_transmembrane_transport pollen_tube_growth transmembrane_transport	antiporter_activity drug_transmembrane_transporter_activity transporter_activity	Q9LYT3	TT12_ARATH Protein TRANSPARENT TESTA 12 OS=Arabidopsis thaliana GN=TT12 PE=2 SV=1
MsMATE49	contig_55303	Medtr4g048000.1	K03327	multidrug resistance protein, MATE family	AT3G21690.1	MATE efflux family protein	GO:0006855 GO:0009610 GO:0015824 GO:0055085	drug_transmembrane_transport proline_transport response_to_symbiotic_fungus transmembrane_transport	antiporter_activity drug_transmembrane_transporter_activity transporter_activity	Q9LYT3	TT12_ARATH Protein TRANSPARENT TESTA 12 OS=Arabidopsis thaliana GN=TT12 PE=2 SV=1
MsMATE50	contig_5593	Medtr4g071420.1	K03327	multidrug resistance protein, MATE family	AT2G21340.1	MATE efflux family protein	GO:0006855 GO:0055085	drug_transmembrane_transport transmembrane_transport	antiporter_activity drug_transmembrane_transporter_activity	Q8W4G3	MATE4_ARATH MATE efflux family protein 4, chloroplastic OS=Arabidopsis thaliana GN=DTX46 PE=2 SV=1
MsMATE51	contig_56894	Glyma.11G133900.1	K03327	multidrug resistance protein, MATE family						Q9SYD6	MATE1_ARATH MATE efflux family protein 1 OS=Arabidopsis thaliana GN=MATE PE=2 SV=2
MsMATE52	contig_57707	mrna03637.1-v1.0-hybrid	K03327	multidrug resistance protein, MATE family						Q8RWF5	MATE9_ARATH MATE efflux family protein 9 OS=Arabidopsis thaliana GN=DTXL5 PE=2 SV=1
MsMATE53	contig_57708	Glyma.10G267800.1	K03327	multidrug resistance protein, MATE family	AT1G71140.1	MATE efflux family protein	GO:0006855 GO:0055085	drug_transmembrane_transport transmembrane_transport	antiporter_activity drug_transmembrane_transporter_activity transporter_activity	Q8GXM8	MATE7_ARATH MATE efflux family protein 7 OS=Arabidopsis thaliana GN=DTXL3 PE=2 SV=1
MsMATE54	contig_58273	Medtr7g087410.1	K03327	multidrug resistance protein, MATE family	AT1G33110.1	MATE efflux family protein	GO:0006855 GO:0009610 GO:0019344 GO:0055085	cysteine_biosynthetic_process drug_transmembrane_transport response_to_symbiotic_fungus transmembrane_transport	antiporter_activity drug_transmembrane_transporter_activity transporter_activity	Q9LYT3	TT12_ARATH Protein TRANSPARENT TESTA 12 OS=Arabidopsis thaliana GN=TT12 PE=2 SV=1
MsMATE55	contig_59273	Medtr1g101500.1	K03327	multidrug resistance protein, MATE family	AT4G23030.1	MATE efflux family protein	GO:0006855 GO:0055085	drug_transmembrane_transport transmembrane_transport	antiporter_activity drug_transmembrane_transporter_activity transporter_activity	Q9SIA4	MATE5_ARATH MATE efflux family protein 5 OS=Arabidopsis thaliana GN=DTXL1 PE=3 SV=1
MsMATE56	contig_59613	Medtr7g082810.1	K03327	multidrug resistance protein, MATE family	AT1G71140.1	MATE efflux family protein	GO:0006855 GO:0055085	drug_transmembrane_transport transmembrane_transport	antiporter_activity drug_transmembrane_transporter_activity transporter_activity	Q9SIA4	MATE5_ARATH MATE efflux family protein 5 OS=Arabidopsis thaliana GN=DTXL1 PE=3 SV=1
MsMATE57	contig_59993	Medtr4g048000.1	K03327	multidrug resistance protein, MATE family	AT3G21690.1	MATE efflux family protein	GO:0006855 GO:0009610 GO:0015824 GO:0055085	drug_transmembrane_transport proline_transport response_to_symbiotic_fungus transmembrane_transport	antiporter_activity drug_transmembrane_transporter_activity transporter_activity	Q9LYT3	TT12_ARATH Protein TRANSPARENT TESTA 12 OS=Arabidopsis thaliana GN=TT12 PE=2 SV=1
MsMATE58	contig_61347	Medtr6g043810.3	K03327	multidrug resistance protein, MATE family	AT1G71870.1	MATE efflux family protein	GO:0006855 GO:0009062 GO:0055085	drug_transmembrane_transport fatty_acid_catabolic_process transmembrane_transport	antiporter_activity drug_transmembrane_transporter_activity transporter_activity	Q9SIA4	MATE5_ARATH MATE efflux family protein 5 OS=Arabidopsis thaliana GN=DTXL1 PE=3 SV=1
MsMATE59	contig_61353	Medtr8g106670.1	K03327	multidrug resistance protein, MATE family	AT5G52450.1	MATE efflux family protein	GO:0006855 GO:0009624 GO:0055085	drug_transmembrane_transport response_to_nematode transmembrane_transport	antiporter_activity drug_transmembrane_transporter_activity transporter_activity	Q8RWF5	MATE9_ARATH MATE efflux family protein 9 OS=Arabidopsis thaliana GN=DTXL5 PE=2 SV=1
MsMATE60	contig_64662	Medtr1g108810.1	K03327	multidrug resistance protein, MATE family	AT5G52450.1	MATE efflux family protein	GO:0006855 GO:0009624 GO:0055085	drug_transmembrane_transport response_to_nematode transmembrane_transport	antiporter_activity drug_transmembrane_transporter_activity transporter_activity	Q9SIA4	MATE5_ARATH MATE efflux family protein 5 OS=Arabidopsis thaliana GN=DTXL1 PE=3 SV=1
MsMATE61	contig_66575	Medtr2g088400.1	K03327	multidrug resistance protein, MATE family	AT3G21690.1	MATE efflux family protein	GO:0006855 GO:0009610 GO:0015824 GO:0055085	drug_transmembrane_transport proline_transport response_to_symbiotic_fungus transmembrane_transport	antiporter_activity drug_transmembrane_transporter_activity transporter_activity	Q9LYT3	TT12_ARATH Protein TRANSPARENT TESTA 12 OS=Arabidopsis thaliana GN=TT12 PE=2 SV=1
MsMATE62	contig_67273	Medtr6g004220.2	K03327	multidrug resistance protein, MATE family	AT1G71140.1	MATE efflux family protein	GO:0006855 GO:0055085	drug_transmembrane_transport transmembrane_transport	antiporter_activity drug_transmembrane_transporter_activity transporter_activity	Q9SIA4	MATE5_ARATH MATE efflux family protein 5 OS=Arabidopsis thaliana GN=DTXL1 PE=3 SV=1
MsMATE63	contig_67274	Glyma.05G001700.1	K03327	multidrug resistance protein, MATE family	AT1G66760.2	MATE efflux family protein	GO:0006855 GO:0009611 GO:0009620 GO:0009695 GO:0009753 GO:0055085	drug_transmembrane_transport jasmonic_acid_biosynthetic_process response_to_fungus response_to_jasmonic_acid_stimulus response_to_wounding transmembrane_transport	antiporter_activity drug_transmembrane_transporter_activity transporter_activity	Q9SIA4	MATE5_ARATH MATE efflux family protein 5 OS=Arabidopsis thaliana GN=DTXL1 PE=3 SV=1
MsMATE64	contig_68249	Medtr2g078970.1	K03327	multidrug resistance protein, MATE family	AT3G23550.1	MATE efflux family protein	GO:0006855 GO:0009723 GO:0055085	drug_transmembrane_transport response_to_ethylene_stimulus transmembrane_transport	antiporter_activity drug_transmembrane_transporter_activity transporter_activity	Q9LUH3	LAL5_ARATH MATE efflux family protein LAL5 OS=Arabidopsis thaliana GN=LAL5 PE=2 SV=1
MsMATE65	contig_6966	Medtr6g047610.1	K03327	multidrug resistance protein, MATE family	AT4G00350.1	MATE efflux family protein	GO:0006855 GO:0009860 GO:0030048 GO:0055085	actin_filament-based_movement drug_transmembrane_transport pollen_tube_growth transmembrane_transport	antiporter_activity drug_transmembrane_transporter_activity transporter_activity	Q9LYT3	TT12_ARATH Protein TRANSPARENT TESTA 12 OS=Arabidopsis thaliana GN=TT12 PE=2 SV=1
MsMATE66	contig_71102	Medtr6g047640.1	K03327	multidrug resistance protein, MATE family	AT4G00350.1	MATE efflux family protein	GO:0006855 GO:0009860 GO:0030048 GO:0055085	actin_filament-based_movement drug_transmembrane_transport pollen_tube_growth transmembrane_transport	antiporter_activity drug_transmembrane_transporter_activity transporter_activity	Q9LYT3	TT12_ARATH Protein TRANSPARENT TESTA 12 OS=Arabidopsis thaliana GN=TT12 PE=2 SV=1
MsMATE67	contig_73257	Medtr2g097900.1	K03327	multidrug resistance protein, MATE family	AT1G51340.2	MATE efflux family protein	GO:0006855 GO:0019761 GO:0055085	drug_transmembrane_transport glucosinolate_biosynthetic_process transmembrane_transport	antiporter_activity drug_transmembrane_transporter_activity	Q9SYD6	MATE1_ARATH MATE efflux family protein 1 OS=Arabidopsis thaliana GN=MATE PE=2 SV=2
MsMATE68	contig_73944	Medtr4g048000.1	K03327	multidrug resistance protein, MATE family	AT3G21690.1	MATE efflux family protein	GO:0006855 GO:0009610 GO:0015824 GO:0055085	drug_transmembrane_transport proline_transport response_to_symbiotic_fungus transmembrane_transport	antiporter_activity drug_transmembrane_transporter_activity transporter_activity	Q9LYT3	TT12_ARATH Protein TRANSPARENT TESTA 12 OS=Arabidopsis thaliana GN=TT12 PE=2 SV=1
MsMATE69	contig_77421	Medtr5g032720.1	K03327	multidrug resistance protein, MATE family	AT5G65380.1	MATE efflux family protein	GO:0006855 GO:0009835 GO:0055085	drug_transmembrane_transport fruit_ripening transmembrane_transport	antiporter_activity drug_transmembrane_transporter_activity transporter_activity	Q9LYT3	TT12_ARATH Protein TRANSPARENT TESTA 12 OS=Arabidopsis thaliana GN=TT12 PE=2 SV=1
MsMATE70	contig_77812	Medtr2g088400.1	K03327	multidrug resistance protein, MATE family	AT3G21690.1	MATE efflux family protein	GO:0006855 GO:0009610 GO:0015824 GO:0055085	drug_transmembrane_transport proline_transport response_to_symbiotic_fungus transmembrane_transport	antiporter_activity drug_transmembrane_transporter_activity transporter_activity	Q9LYT3	TT12_ARATH Protein TRANSPARENT TESTA 12 OS=Arabidopsis thaliana GN=TT12 PE=2 SV=1
MsMATE71	contig_78048	Medtr6g047610.1	K03327	multidrug resistance protein, MATE family	AT4G00350.1	MATE efflux family protein	GO:0006855 GO:0009860 GO:0030048 GO:0055085	actin_filament-based_movement drug_transmembrane_transport pollen_tube_growth transmembrane_transport	antiporter_activity drug_transmembrane_transporter_activity transporter_activity	Q9LYT3	TT12_ARATH Protein TRANSPARENT TESTA 12 OS=Arabidopsis thaliana GN=TT12 PE=2 SV=1
MsMATE72	contig_79227	Medtr1g108990.1	K03327	multidrug resistance protein, MATE family	AT1G71140.1	MATE efflux family protein	GO:0006855 GO:0055085	drug_transmembrane_transport transmembrane_transport	antiporter_activity drug_transmembrane_transporter_activity transporter_activity	Q9SIA4	MATE5_ARATH MATE efflux family protein 5 OS=Arabidopsis thaliana GN=DTXL1 PE=3 SV=1
MsMATE73	contig_79859	Medtr7g087410.1	K03327	multidrug resistance protein, MATE family	AT1G33110.1	MATE efflux family protein	GO:0006855 GO:0009610 GO:0019344 GO:0055085	cysteine_biosynthetic_process drug_transmembrane_transport response_to_symbiotic_fungus transmembrane_transport	antiporter_activity drug_transmembrane_transporter_activity transporter_activity	Q9LYT3	TT12_ARATH Protein TRANSPARENT TESTA 12 OS=Arabidopsis thaliana GN=TT12 PE=2 SV=1
MsMATE74	contig_81761	Medtr6g066380.1	K03327	multidrug resistance protein, MATE family	AT5G52450.1	MATE efflux family protein	GO:0006855 GO:0009624 GO:0055085	drug_transmembrane_transport response_to_nematode transmembrane_transport	antiporter_activity drug_transmembrane_transporter_activity transporter_activity	Q8RWF5	MATE9_ARATH MATE efflux family protein 9 OS=Arabidopsis thaliana GN=DTXL5 PE=2 SV=1
MsMATE75	contig_81781	Medtr7g087400.1	K03327	multidrug resistance protein, MATE family	AT1G33110.1	MATE efflux family protein	GO:0006855 GO:0009610 GO:0019344 GO:0055085	cysteine_biosynthetic_process drug_transmembrane_transport response_to_symbiotic_fungus transmembrane_transport	antiporter_activity drug_transmembrane_transporter_activity transporter_activity	Q9LYT3	TT12_ARATH Protein TRANSPARENT TESTA 12 OS=Arabidopsis thaliana GN=TT12 PE=2 SV=1
MsMATE76	contig_83808		K03327	multidrug resistance protein, MATE family
MsMATE77	contig_84193	Medtr3g111020.1	K03327	multidrug resistance protein, MATE family	AT1G58340.1	ZF14 | MATE efflux family protein |	GO:0003156 GO:0006810 GO:0006855 GO:0009624 GO:0055072 GO:0055085	drug_transmembrane_transport iron_ion_homeostasis regulation_of_organ_formation response_to_nematode transmembrane_transport transport	antiporter_activity drug_transmembrane_transporter_activity transmembrane_transporter_activity transporter_activity	Q9SIA4	MATE5_ARATH MATE efflux family protein 5 OS=Arabidopsis thaliana GN=DTXL1 PE=3 SV=1
MsMATE78	contig_89783	Medtr8g037170.1	K03327	multidrug resistance protein, MATE family	AT3G08040.2	FRD3, MAN1, ATFRD3 | MATE efflux family protein |	GO:0006826 GO:0006855 GO:0006879 GO:0010106 GO:0010167 GO:0010413 GO:0015706 GO:0045492 GO:0055085 GO:0071281 GO:0071369 GO:0071732	cellular_iron_ion_homeostasis cellular_response_to_ethylene_stimulus cellular_response_to_iron_ion cellular_response_to_iron_ion_starvation cellular_response_to_nitric_oxide drug_transmembrane_transport glucuronoxylan_metabolic_process iron_ion_transport nitrate_transport response_to_nitrate transmembrane_transport xylan_biosynthetic_process	antiporter_activity citrate_transmembrane_transporter_activity drug_transmembrane_transporter_activity transporter_activity	Q9SFB0	FRD3_ARATH MATE efflux family protein FRD3 OS=Arabidopsis thaliana GN=FRD3 PE=1 SV=1
MsMATE79	contig_9017	Medtr5g010830.1	K03327	multidrug resistance protein, MATE family	AT4G23030.1	MATE efflux family protein	GO:0006855 GO:0055085	drug_transmembrane_transport transmembrane_transport	antiporter_activity drug_transmembrane_transporter_activity transporter_activity	Q9SIA4	MATE5_ARATH MATE efflux family protein 5 OS=Arabidopsis thaliana GN=DTXL1 PE=3 SV=1
MsMATE80	contig_93500	Medtr8g085650.1	K03327	multidrug resistance protein, MATE family	AT4G00350.1	MATE efflux family protein	GO:0006855 GO:0055085	drug_transmembrane_transport root_hair_cell_differentiation transmembrane_transport	antiporter_activity drug_transmembrane_transporter_activity transporter_activity	Q9SIA4	MATE5_ARATH MATE efflux family protein 5 OS=Arabidopsis thaliana GN=DTXL1 PE=3 SV=1
MsMATE81	contig_94295	Medtr2g097900.1	K03327	multidrug resistance protein, MATE family	AT1G51340.2	MATE efflux family protein	GO:0006855 GO:0019761 GO:0055085	drug_transmembrane_transport glucosinolate_biosynthetic_process transmembrane_transport	antiporter_activity drug_transmembrane_transporter_activity	Q9SYD6	MATE1_ARATH MATE efflux family protein 1 OS=Arabidopsis thaliana GN=MATE PE=2 SV=2
MsMATE82	contig_95573	Medtr2g088400.1	K03327	multidrug resistance protein, MATE family	AT3G21690.1	MATE efflux family protein	GO:0006855 GO:0009610 GO:0015824 GO:0055085	drug_transmembrane_transport proline_transport response_to_symbiotic_fungus transmembrane_transport	antiporter_activity drug_transmembrane_transporter_activity transporter_activity	Q9LYT3	TT12_ARATH Protein TRANSPARENT TESTA 12 OS=Arabidopsis thaliana GN=TT12 PE=2 SV=1
MsMATE83	contig_96525	Medtr2g435930.1	K03327	multidrug resistance protein, MATE family	AT5G49130.1	MATE efflux family protein	GO:0006855 GO:0055085	drug_transmembrane_transport transmembrane_transport	antiporter_activity drug_transmembrane_transporter_activity transporter_activity	Q9SIA4	MATE5_ARATH MATE efflux family protein 5 OS=Arabidopsis thaliana GN=DTXL1 PE=3 SV=1
MsMATE84	contig_96930	Medtr7g070210.1	K03327	multidrug resistance protein, MATE family	AT2G38330.1	MATE efflux family protein	GO:0006855 GO:0055085	drug_transmembrane_transport transmembrane_transport	antiporter_activity drug_transmembrane_transporter_activity transporter_activity	Q84K71	MATE2_ARATH MATE efflux family protein 2, chloroplastic OS=Arabidopsis thaliana GN=DTX44 PE=2 SV=1
MsMATE85	contig_97072	Medtr8g069470.1	K03327	multidrug resistance protein, MATE family	AT1G12950.1	RSH2 | root hair specific 2 |	GO:0006855 GO:0048765 GO:0055085	drug_transmembrane_transport root_hair_cell_differentiation transmembrane_transport	antiporter_activity drug_transmembrane_transporter_activity transporter_activity	Q9LYT3	TT12_ARATH Protein TRANSPARENT TESTA 12 OS=Arabidopsis thaliana GN=TT12 PE=2 SV=1
MsMATE86	contig_9750	Medtr6g066380.1	K03327	multidrug resistance protein, MATE family	AT5G52450.1	MATE efflux family protein	GO:0006855 GO:0009624 GO:0055085	drug_transmembrane_transport response_to_nematode transmembrane_transport	antiporter_activity drug_transmembrane_transporter_activity transporter_activity	Q9SIA4	MATE5_ARATH MATE efflux family protein 5 OS=Arabidopsis thaliana GN=DTXL1 PE=3 SV=1
MsMATE87	contig_97618	Medtr6g081390.1	K03327	multidrug resistance protein, MATE family	AT5G52450.1	MATE efflux family protein	GO:0006855 GO:0009624 GO:0055085	drug_transmembrane_transport response_to_nematode transmembrane_transport	antiporter_activity drug_transmembrane_transporter_activity transporter_activity	Q9SIA5	DTX1_ARATH MATE efflux family protein DTX1 OS=Arabidopsis thaliana GN=DTX1 PE=2 SV=1
MsMATE88	contig_99934	Medtr4g048000.1	K03327	multidrug resistance protein, MATE family	AT3G21690.1	MATE efflux family protein	GO:0006855 GO:0009610 GO:0015824 GO:0055085	drug_transmembrane_transport proline_transport response_to_symbiotic_fungus transmembrane_transport	antiporter_activity drug_transmembrane_transporter_activity transporter_activity	Q9LYT3	TT12_ARATH Protein TRANSPARENT TESTA 12 OS=Arabidopsis thaliana GN=TT12 PE=2 SV=1
